# Supplementary material for: Identification of 5HT2A, GlyR subunits, and Nav1.1 channel as targets of AAV-BDNF therapy in lumbar motoneurons after spinal cord injury
Source: Research Square preprint supplement (doi:10.21203/rs.3.rs-7794877/v1), 2025-10-30
Supplement: Supplementary file 1 [file ec5870c0c45373a7cf6eff49.docx]

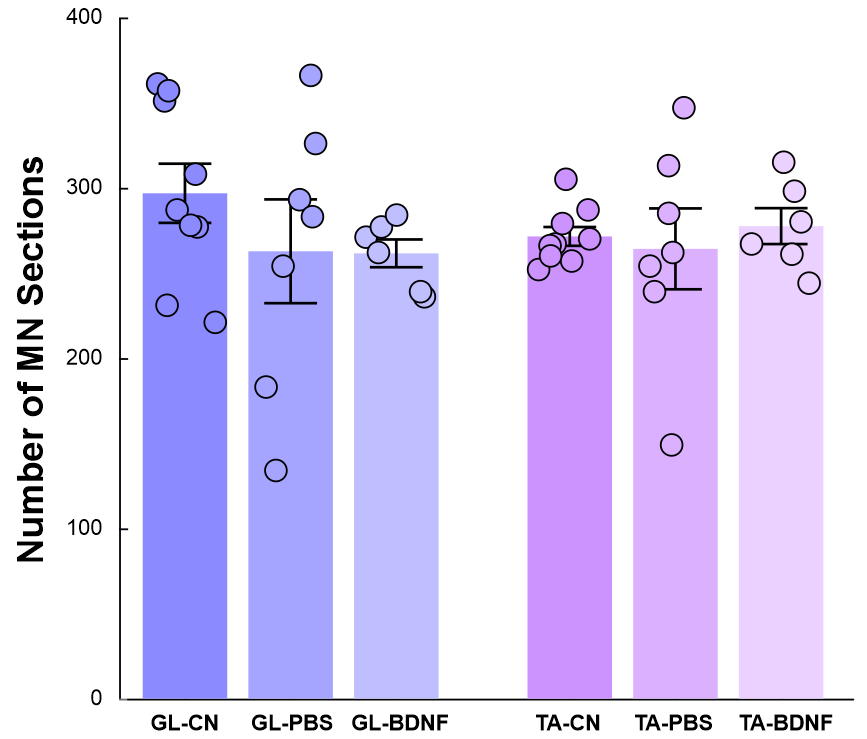


**Fig S1.** The number of GL and TA MNs isolated from the CN (N=9), SCT-PBS (N=7) and SCT-BDNF (N=6) groups of rats. Data are presented as mean +/- SEM. Differences between groups are non-significant (One-way ANOVA with Tukey's post-hoc test).

**Table 1. List of used probes and primers**

| **Gene symbol** | **Name of coded protein** | **Accession number** | **Roche**  **UPL No.** | **Forward primer**  **(5’–3’)** | **Reverse Primer**  **(5’–3’)** | **Amplicon length/nt** |
| --- | --- | --- | --- | --- | --- | --- |
| *Gria1* | AMPAR GluA1 | NM_031608.1 | 69 | tcccttgaccataaccttgg | actcatgaatggcttggagaa | 61 |
| *Gria2* | AMPAR GluA2 | NM_017261.2; NM_001083811.1 | 67 | ggaggtgattccaaggaaaag | cccccgacaaggatgtaga | 77 |
| *Gria3* | AMPAR GluA3 | NM_032990.2; NM_001112742.1 | 94 | ccaagaatgcaccactgaag | ctgcgggagacatccact | 109 |
| *Grin1* | NMDAR GluN1 | NM_001270602.1 | 95 | cctacacagctggcttctacag | cgaaggaaactcaggtggat | 94 |
| *Grin2a* | NMDAR GluN2A | NM_012573.3 | 94 | cgtcatggtctccaggagtaa | cactgaagggttcgaggaaa | 62 |
| *Grin2b* | NMDAR GluN2B | NM_012574.1 | 106 | tcctgcagctgtttggagat | gctgctcatcacctcattctt | 95 |
| *Gabra2* | GABAAR α2 | NM_001135779.2 | 94 | gacagacttctggatggttacga | ggtcacatagatgttggtggag | 87 |
| *Gabra3* | GABAAR α3 | NM_017069.3 | 129 | cctacttgccatgtatcatgactg | ggtcatggtgagaacagtggt | 113 |
| *Gabrb3* | GABAAR β3 | NM_017065.1 | 80 | atcgagctcccacagttctc | tcaatgagagtcgagggtagg | 91 |
| *Gabrg2* | GABAAR γ2 | NM_183327.1 | 75 | ttgaagtgggagacacaaggt | cggacataaccacatagtcacc | 111 |
| *Glra1* | GlyR α1 | NM_013133.1 | 69 | ccggcaacacaaggaact | tctccaccctcatcatcctt | 69 |
| *Glrb* | GlyR β | NM_053296.1 | 29 | ggatctattcaagagacaacaatgg | gcttgagtctggggtcgtt | 79 |
| *Slc12a4* | KCC1 | NM_019229.2 | 101 | acagagcgggatcgagag | ctctggtccatgtcatctgg | 130 |
| *Slc12a5* | KCC2 | NM_134363.1 | 75 | ttctggacaaccaccctca | ggcagaagcccttcacct | 84 |
| *Slc12a6* | KCC3 | NM_001109630.1 | 124 | gcgtcttacctgggtagtgg | tggagatggcagttaacattgta | 95 |
| *Scn1a* | Nav1.1 | NM_030875.2 | 67 | agaaccaggccacattggag | gttctgatgctgttgctgcc | 120 |
| *Scn8a* | Nav1.6 | NM_019266.3 | 67 | agagcaaaaagaggccgagt | tcttcaatggcgtcttccga | 120 |
| *Scn9a* | Nav1.7 | NM_133289.2 | 129 | ggtcatggtgattgggaacc | ttgtttgcatcggtgtcttcc | 111 |
| *Cacna1b* | Cav2.2 | NM_001195199.1  NM_147141.1 | 73 | cggcactggagatcaagc | gcagattagcccacacagaag | 96 |
| *Cacna1d* | Cav1.3 | NM_001389225.2 | 69 | cccttatccaccctgcgatg | agattcttcgaggacgggga | 98 |
| *Kcnn2* | SK2 (KCa2.2) | NM_001309404.1; NM_019314.2 | 113 | gcgttttgttatgaagactttaatga | gtgacatcctgttgatcatggta | 132 |
| *Kcnn3* | SK3 (KCa2.3) | NM_019315.2 | 69 | ttcagggctcccaattca | atttagctggctgccttgc | 72 |
| *Kcnma1* | KCa1.1 | NM_031828.1 | 56 | cctcacacagccctttgc | gggtgaggatattgtcattgaag | 95 |
| *Grm1a* | mGluR1A | NM_017011.1 | 101 | caccgaagaagatgaattgga | gaatcctcaggggtcagctt | 69 |
| *Grm5* | mGluR5 | NM_017012.1 | 82 | tccagcagcctagtcaacct | gattttccgttggagcttagg | 71 |
| *Chrm2* | M2R | NM_031016.2 | 64 | ccaccttcagactgtcaacaatta | catggagaaaacacctatgatgag | 76 |
| *Htr2a* | 5-HTR2A | NM_017254.1 | 69 | agcactcgagccaaactagc | tggaagagcttttctgatgaca | 71 |
| *Htr2b* | 5-HTR2B | NM_017250.2 | 129 | cgcggtaataatccccacca | ccaccgccaaggacattaga | 110 |
| *Htr2c* | 5-HTR2C | NM_012765.3 | 69 | aagaaggtgttcgttggcct | ccgtttctcgtctagctgcc | 106 |
| *Adra1a* | NAα1A | NM_017191.2 | 50 | gcgtctgggtgctttctttg | ggctcctcattgatctggca | 100 |
| *Adra1d* | NAα1D | NM_024483.2 | 129 | tgtgctggttccccttcttc | agcgggttcacacagctatt | 124 |
| *GAPDH* | GAPDH | NM_017008.4 | * | ctgcaccaccaactgcttag | tgatggcatggactgtgg | 92 |
| *sequence: tttggcatcgtg. Synthesized by Institute of Biochemistry and Biophysics, Polish Academy of Sciences, Warsaw, Poland | | | | | | |

**Table 2. List of probes used for RNAscope method**

| Probe | cat. no | Target description |
| --- | --- | --- |
| Rn-Ngfr | 406351 | *Rattus norvegicus* nerve growth factor receptor (Ngfr), mRNA |
| Rn-Ntrk2-C2 | 317531-C2 | *Rattus norvegicus* neurotrophic tyrosine kinase receptor type 2 (Ntrk2) transcript variant 1 mRNA |
| Rn-BDNF | customer designed, produced by ACDBio | Brain-derived neurotrophic factor (bdnf), mRNA BC087634.1 |
| Polr2A C1 - positive control  PPIB C2 - positive control  UBC C3 - positive control | 320891 | DNA-directed RNA polymerase II subunit RPB1  cyclophilin B  ubiquitin C |
| DapB (C1, C2, C3)  – negative control | 320871 | DapB gene (enzyme from *Bacillus subtilis)* |

**Table 3. Primary and secondary antibodies for immunofluorescence**

| Target | Host | Cat. no | Dilution | Producer |
| --- | --- | --- | --- | --- |
| C-Myc tag | Mouse | 9B11 | 1:500 | Cell Signaling Technology, Danvers, MA, USA |
| Brain-derived neurotrophic factor (BDNF) | Rabbit | ANT-010 | 1:200 | Alomone Labs, Jerusalem, Israel |
| Anti-Mouse, conjugated with Alexa Fluor 488 | Donkey | A21202 | 1:500 | Invitrogen, Carlsbad,  CA, USA |
| Anti-Rabbit, conjugated with Alexa Fluor 568 | Donkey | A-10042 | 1:500 | Thermo Fisher Scientific, Waltham, MA, USA |
